## **SRF-MYOCD axis is the targetable driver of a well differentiated aggressive subtype of leiomyosarcomas**

Elodie Darbo<sup>1,2,3</sup>, Gaëlle Pérot<sup>4,5</sup>, Lucie Darmusey<sup>4,6,7</sup>, Sophie Le Guellec<sup>4,6</sup>, Laura Leroy<sup>4,6</sup>, Laëtitia Gaston<sup>8</sup>, Nelly Desplat<sup>1</sup>, Noémie Thébault<sup>4,6</sup>, Candice Merle<sup>4,6,7</sup>, Philippe Rochaix<sup>4,6</sup>, Thibaud Valentin<sup>4,9</sup>, Gwenaël Ferron<sup>4,10</sup>, Christine Chevreau<sup>9</sup>, Binh Bui<sup>11</sup>, Eberhard Stoeckle<sup>12</sup>, Dominique Ranchere-Vince<sup>13</sup>, Pierre Mééus<sup>14</sup>, Philippe Terrier<sup>15</sup>, Sophie Piperno-Neumann<sup>16</sup>, Françoise Colin<sup>17</sup>, Gonzague De Pinieux<sup>18</sup>, Florence Duffaud<sup>19</sup>, Jean-Michel Coindre<sup>1,20</sup>, Jean-Yves Blay<sup>21,22</sup>, Frédéric Chibon<sup>1,4,6</sup>

1. INSERM UMR1218, ACTION, Institut Bergonié, Bordeaux, France.
2. CNRS UMR5800, LaBRI, Talence, France.
3. Université de Bordeaux, Bordeaux, France.
4. OncoSarc, INSERM U1037, Cancer Research Center in Toulouse (CRCT), Toulouse, France.
5. Centre Hospitalier Universitaire (CHU) de Toulouse, IUCT-Oncopole, Toulouse, France.
6. Department of Pathology, Institut Claudius Régaud, IUCT-Oncopole, Toulouse, France.
7. University of Toulouse 3, Toulouse, France.
8. Department of Medical Genetics, CHU de Bordeaux, Bordeaux, France.
9. Department of Oncology, Institut Claudius Régaud, IUCT-Oncopole, Toulouse, France.
10. Department of Surgical Oncology, Institut Claudius Régaud, IUCT-Oncopole, Toulouse, France.
11. Department of Oncology, Institut Bergonié, Bordeaux, France.
12. Department of Surgery, Institut Bergonié, Bordeaux, France.
13. Department of Pathology, Centre Léon Bérard, Lyon, France.
14. Department of Surgery, Centre Léon Bérard, Lyon, France.
15. Department of Pathology, Institut Gustave Roussy, Villejuif, France.
16. Department of Medical Oncology, Institut Curie, Paris, France.
17. Department of Pathology, Centre Georges-François Leclerc, Dijon, France.
18. Department of Pathology, Hôpital Universitaire Trousseau, Tours, France.
19. Medical Oncology Unit, Aix Marseille University, APHM Hôpital La Timone, Marseille, France.
20. Department of Pathology, Institut Bergonié, Bordeaux, France.
21. Department of Medical Oncology, Centre Léon Bérard, Lyon, France.
22. Université Claude Bernard Lyon 1, INSERM U1052, CNRS 5286, Centre Léon Bérard, Lyon, France.

**Running title:** SRF/MYOCD is the targetable driver in a subtype of leiomyosarcoma

**Key words:** SRF, MYOCD, leiomyosarcoma, oncogenesis, treatment

**Corresponding author:** Frédéric Chibon, Cancer Research Center in Toulouse (CRCT), 2 avenue Hubert Curien, 31037, Toulouse, France, 0582741765, Frederic.chibon@inserm.fr

**Financial support:** The Instituts Thematiques Multiorganismes (ITMO) Cancer and the Claudius Regaud Institute supported this work.

**Conflict of interest:** The authors declare no potential conflicts of interest.

### **Authors' Contributions:**

**Conception and design:** E. Darbo, F. Chibon, G. Pérot, L. Darmusey

**Development of methodology:** E. Darbo, F. Chibon

**Acquisition of data (provided animals, acquired and managed patients, provided facilities, etc.):** E. Darbo, G. Pérot, L. Darmusey, S. Le Guellec, L. Leroy, L. Gaston, N. Desplat, N. Thébault, C. Merle

**Analysis and interpretation of data (e.g., statistical analysis, biostatistics, computational analysis):** E. Darbo, F. Chibon, G. Pérot, L. Darmusey

**Writing, review, and/or revision of the manuscript:** E. Darbo, F. Chibon, G. Pérot, L. Darmusey

**Administrative, technical or logistic support (i.e., reporting or organizing data, constructing databases):** P. Rochaix, T. Valentin, G. Ferron, C. Chevreau, B. Bui, E. Stoeckle, D. Ranchere-Vince, P. Méeus, P. Terrier, S. Piperno-Neumann, F. Colin, G. De Pinieux, F. Duffaud, J.M. Coindre, J.Y. Blay

**Study supervision:** F. Chibon

**Other (data, expertise, and guidance):** The French Sarcoma Group and the International Cancer Genome Consortium

## **Abstract**

Based on the transcriptome analysis of 555 sarcomas, we identified a group of tightly clustered leiomyosarcomas (LMS) due to their gene expression homogeneity. We named them “hLMS” and the other LMS “oLMS”. We derived a transcriptional signature able to identify each group and used it to classify patients from two independent cohorts. In all cohorts, hLMS were preferentially carried by women, located in the internal trunk, highly differentiated, and similarly altered at the genomic level. Based on integrative bioinformatic analysis, we show that hLMS originate from vascular smooth muscle cells presenting both contractile and synthetic characteristics, while oLMS could derive from fibroblasts. We found strong *MYOCD* expression to be an hLMS-specific driver and show that the MYOCD/SRF axis is essential only for hLMS survival. Identification of hLMS could become standard clinical practice, leading to the development of specific effective treatments with MYOCD/SRF inhibitors.

## ***Statement of significance***

Leiomyosarcomas (LMS) are currently treated as a single entity. However, we have now identified a transcriptionally, genomically and clinically homogeneous subgroup of LMS. Their oncogenesis is driven by the acquisition of high differentiation through *MYOCD* over-expression. This confers them sensitivity to MYOCD/SRF inhibitors, which could thus become a potential therapeutic target.

## **Introduction**

Leiomyosarcoma (LMS) is a rare mesenchymal malignancy presenting smooth muscle differentiation and accounting for 11% of adult soft tissue sarcomas (STS) (1). LMS arises in various anatomical sites but mostly the uterus, the retroperitoneum and the limbs. LMS is one of the most aggressive STS subtypes as up to 50% of patients relapse (2) with a median survival of 12 months. However, the main treatment involves wide surgical resection for localized LMS or anthracycline-based chemotherapies for metastatic tumors, since neither targeted therapy (3) nor immunotherapy (4) have demonstrated any major therapeutic effects until now.

LMS oncogenesis is organized around a highly rearranged genome with a high number of chromosomal rearrangements leading to many copy number variations (CNV) and break-points, which are associated with poor outcome (5). However, no specific recurrent pathogenic event has been detected so far.

Stratifying patients on gene-expression profiling based on the unique prognostic and therapeutic characteristics of the tumors has been shown to improve patient outcome, thanks to the development of adapted therapies in several cancer types such as breast (6) and colon (7) cancer.

Subgroups of LMS have been identified by using different transcriptomic sequencing methods and sample collections (8–16). One subgroup was consistently highlighted with a homogeneous transcriptomic profile, expression of smooth muscle cell (SMC) differentiation markers, a higher differentiation and localized in the retroperitoneum. Nonetheless, no standardized methodology has yet emerged and the discrepancies between the reported subtypes hamper understanding of the specific biology or oncogenesis of these tumors that is essential for improving clinical care.

In an elegant study, Watson and colleagues reported that sarcomas with a strong chimeric driver oncogene have a homogenous and specific transcriptomic program (17). Therefore, we hypothesized that such a mechanism could be identified in LMS showing this characteristic. Accordingly, we conducted a systematic transcriptome-wide investigation comparing LMS (with exclusion of uterine LMS which are quite well recognizable (18)) to hundreds of other sarcomas. This highlighted two groups of LMS differing in their transcriptional homogeneity. We developed a transcriptional signature to robustly classify LMS into two groups with consistent clinical associations and gene expression in three independent cohorts. By combining “omics” data at the genome, transcriptome and micro RNA levels, we were able to establish two distinct patterns of oncogenesis that differentiate LMS into at least two pathologies originating from different cell types. One of the subgroups predicted by the signature presents a therapeutic vulnerability, which could pave the way for a new treatment option.

## **Results**

### ***Identification of a group of 42 LMS behaving as simple genetic sarcomas***

To detect LMS molecular subtypes within sarcoma samples, we combined micro-array datasets obtained on Affymetrix (387 complex genetic sarcomas including 98 LMS) and Agilent platforms (60 GIST, 58 synovial sarcomas, 50 LPS and 87 complex genetic sarcomas) (**Supplementary Figure S1A**, total = 555 samples). Using the strategy described in the methods and illustrated in **Supplementary Figure S1C**, we selected 9066 genes (out of 17854 genes common to both platforms) showing enough consistency to enable merging and normalization of all datasets. We assumed that selecting modules of co-expressed genes that potentially group genes with similar functions would lead to more meaningful patient clustering. We detected 15 co-expression modules (out of 54) carrying at least 5 genes from

455 highly correlated genes. Thirteen modules were significantly associated with biological functions and cellular components (*e.g.* immune system activation, cell cycle, skeletal muscle or smooth muscle-related, adipogenesis, extracellular matrix, apical plasma membrane, genomic positional bias, **Supplementary Table S1A, Figure S1D**). We used these 54 modules in a non-supervised approach to cluster the 555 samples and observed a subgroup of LMS clustering together, while the other LMS were mixed with other pleomorphic sarcomas. This LMS subgroup appeared to behave like sarcomas with a recurrent alteration, *i.e.* with a fairly homogenous transcriptomic program driven by a strong oncogene (17), as observed with GIST, myxoid liposarcomas and synovial sarcomas (**Figure 1A**). We thus hypothesized that this LMS subgroup (41 patients over the 98 LMSs) could be driven by a strong oncogenic program reflected by this specific gene expression profile.

To select genes that best characterized these LMS, we compared them with the remaining 57 LMS which were mixed with the other sarcomas. As the 98 LMS were all analyzed on the Affymetrix chip, we used the 22635 genes present in the chip. We identified 1672 differentially expressed genes (**Supplementary Table S2A**) that we used to re-cluster the samples. Almost all samples were classified similarly (95/98) regarding the analysis performed above on the 555 samples. We obtained 42 homogeneous LMS (hLMS) and 56 other LMS (oLMS) (**Figure 1B**).

***hLMS are intra-abdominal, low-grade and metastatic LMS with homogeneous transcriptional behavior***

After having confirmed that gene expression profiles within hLMS were significantly more homogeneous than within the other group (Wilcoxon's test;  $P = 2.9 \times 10^{-13}$ ), we tested clinical feature enrichments (**Table 1**). hLMS were mostly located in the abdominal cavity ( $P = 8.5 \times 10^{-9}$ ), developed in females ( $P = 0.003$ ), were well differentiated ( $P = 3.9 \times 10^{-9}$ ) and

consequently were more frequently grade 1 or 2 (low grades,  $P = 5.5 \times 10^{-4}$ ). Interestingly, despite this differentiation and grading, they had a poorer prognosis than oLMS ( $P = 0.0054$ , **Figure 1C**).

### ***hLMS are characterized by both contractile and synthetic smooth muscle cell phenotypes***

Functional enrichment analysis of differentially expressed (DE) hLMS/oLMS genes (**Figure 1D** and detailed in **Supplementary Tables S1B** and **C**) revealed biological differences between the two groups. The transcriptional program in hLMS is strongly associated with smooth muscle cell and cell cycle activity, as evidenced by the enrichment of *E2F* and *RBI* targets, CINSARC signature, DNA replication, metabolism and mitochondrial activity in up-regulated genes. In line with these results, activating marks (H3K4me1, H3K27Ac and H3K9Ac) from ChiP-seq experiments in smooth muscles (stomach, rectum, colon, aorta) as well as ChiP-seq peaks for *SRF* and *MEF2A* were enriched in over-expressed hLMS genes (**Supplementary Table S1D**, **Figure 1E**). On the other hand, oLMS were associated with ER-Golgi related terms, epithelial-mesenchymal transition and the TGF $\beta$  signaling pathway, while enriched histone marks in over-expressed oLMS genes were found to be comparable to those in fibroblasts, epithelial and derived mesenchymal stem cells. These genes are under the regulation of transcription factors (TF) like *MYC*, *ETS1* or *ELK1*. Therefore, we hypothesize that hLMS and oLMS originate from distinct cell types.

To investigate the potential origin of hLMS, we analyzed the 100 most expressed hLMS genes in 7414 samples from 30 different normal tissues (TCGA GTEX dataset). Using a t-SNE approach, we observed that these genes allowed normal samples to be grouped mainly according to their tissue of origin (**Supplementary Figure S2A**). Visceral smooth muscle tissues were mixed and separated from blood vessels to which the hLMS were the closest. hLMS and oLMS were well separated and oLMS showed a wider distribution between lung,

adipose and breast tissues. These results support our hypothesis that the two LMS groups have a different origin and suggest that hLMS could originate from vascular smooth muscle cells.

We annotated these 100 genes (**Supplementary Figure S2B**) using GSA<sub>n</sub> (19) (**Supplementary Table S1E**) and found that 50 of them are part of the extracellular exosome, which are molecules (mRNA or proteins) exported to the extracellular space. This highlights the role of the extracellular matrix (ECM) and of cell-to-cell communication in hLMS pathology. Cell differentiation and migration were represented by 32 and 24 genes, respectively, which suggests the co-existence of both contractile (*MYH11*, *CNN1*, *MYL9*, *LMOD1*) and synthetic (*FNI*, *TNC*, *COL1A1/2*, *MSN*, *MFAP4*) phenotypes in hLMS and in blood vessels.

To complete our analysis of the genomic differences between hLMS and oLMS, we used multi-omics to analyze two additional LMS cohorts.

### ***Gene signature identifies hLMS in two independent cohorts***

To classify LMS from the ICGC (59 patients) and TCGA (75 patients) (20) cohorts, we computed the distance to hLMS and oLMS centroids based on the expression of the 1672 DE genes from the Affymetrix cohort. When the cohorts were merged, 102 cases were strongly enough correlated with one centroid (**Figure 1F**), classifying 73 as hLMS and 29 as oLMS. Computation of clinical enrichment showed hLMS to be mainly intra-abdominal ( $P = 1.5 \times 10^{-7}$ ), well differentiated ( $P = 1.8 \times 10^{-5}$ ), carried by women ( $P = 0.007$ ) and with homogeneous transcriptional profiles ( $P < 2.2 \times 10^{-16}$ ) (**Table 1**), consistent with information from the training cohort. However, we observed no difference in metastasis-free survival between the two groups.



### ***miRNAs adopt specific behavior in hLMS***

We analyzed 475 expressed mature miRNAs from the 39 patients in the ICGC cohort (28 hLMS and 11 oLMS) and 453 in the 60 TCGA patients (43 hLMS and 17 oLMS). PCA analysis performed with all expressed miRNAs strongly differentiated hLMS and oLMS along the first principal component, which explains 37% (ICGC) and 50.2% of the variance (TCGA) (**Figure 2A**). The high correlation ( $R^2 = 0.69$ , **Figure 2A**) between hLMS/oLMS log-fold changes from both cohorts indicates that each group identified independently in each cohort is consistent and represents two groups of similar diseases. The results of DE analyses of both cohorts are presented in **Supplementary Table S2B**.

We used the TCGA pan cancer (PANCAN) dataset to validate our hypothesis that the two groups have a different cellular origin. To this end, we used the 41 significantly differentially expressed miRNAs (35 under-expressed and 6 over-expressed in hLMS) to classify all the cancer samples (**Figure 2B**). All hLMS clustered together among 467 samples mainly from prostate adenocarcinomas (65%), digestive track tumors (stomach, colon, esophagus, rectum: altogether 14%), LMS (13 gynecological, 8 unclassified: together with hLMS, 13.7%). The most discriminative miRNAs of the cluster containing hLMS were 4 of the 6 over-expressed miRNAs in hLMS (*MIR143-3p*, *MIR145-3/5p* and *MIR1*). These miRNAs are involved in feedforward (*MIR143/145*) (21) and negative feedback (*MIR1*) (22) loops during smooth muscle differentiation. These results corroborated our hypothesis of a smooth muscle origin of hLMS, unlike oLMS which were spread across several clusters.

Interestingly, all 87 mature miRNAs located in the DLK1-DIO3 imprinted genomic region on chromosome 14 (14q32) were repressed in hLMS. Indeed, 25 miRNAs are among the 35 significantly down-regulated in hLMS (highlighted in **Figure 2C**), 20 other show negative log-fold changes (**Supplementary Figure S3A**) with very low expression in hLMS (**Supplementary Figure S3B**), and 42 were not detected in any LMS groups in at least one of

the cohorts. To evaluate the specificity of this global repression, we compared the expression profiles of the 72 miRNAs (among the 87 DLK1-DIO3) present in the PANCAN dataset. Most hLMS (37/42) clustered within a group of 563 patients, representing 6% of all samples, preferentially with kidney (37%), thyroid (23%), eye (11%) carcinomas and sarcomas (5.5%, 13 gynecological LMS, 1 unclassified LMS, 2 oLMS, 7 UPS, 6 myxofibrosarcomas, 3 dedifferentiated liposarcomas) (**Supplementary Figure 3C**), and none of the visceral smooth muscle-related cancers (stomach, colon, rectum, etc.). These results suggest an uncommon repression that might be due to a specific mode of oncogenesis rather than to a vSMC origin. To evaluate the putative impact of dysregulated miRNAs on hLMS biology, we analyzed their post-transcriptional regulatory network by integrating mRNA and miRNA expression data. We found 14620 significant miRNA-mRNA interactions predicted in both ICGC and TCGA cohorts (negative Pearson's correlation coefficient (PCC), adjusted  $P < 0.01$ ), of which 210 were present in at least one database (**Supplementary Table S2C**). We annotated the 158 corresponding target genes (35 down- and 123 up-regulated in hLMS) with GSA (19). Twenty-one terms with high specificity were mapped and none of them was specific to DIO3-DLK1 miRNA cluster, up- or down-regulated target genes, except "response to glucose" which was represented only by up-regulated genes (**Figure 2D**, detailed in **Supplementary Table S1F**). Dysregulated genes are implicated in major pathways, such as cell migration ("plasma membrane-bound cell projection assembly", "extracellular matrix disassembly"), cell contraction ("regulation of heart contraction", "cation channel activity", "calcium ion transport"), cell cycle and transcriptional regulation. Of note, significant interactions involving the most deregulated miRNAs were previously reported to have an impact on SMC phenotypes. Indeed, *MIR28*, which was over-expressed in hLMS, was found either to promote proliferation targeting *NME1* (average PCC: -0.61) or to inhibit it by targeting *CCND1* (average PCC: -0.48) in colon cancer (23). *MIR455*, *MIR199a* and *MIR503/MIR424*, which

were under-expressed in hLMS, suppress proliferation and migration in pulmonary arterial or bladder SMC targeting *FGF7* (24) (average PCC: -0.7), *DDR1* (25) (average PCC: -0.7) and *FGF2*, respectively (average PCC: -0.63/-0.68) (26).

The transcriptional profile of miRNAs and its predicted regulatory network revealed the putative vascular smooth muscle origin and showed a strong relationship with both vSMC contractile and synthetic phenotypes. The question therefore arose whether these two types of LMS also have a distinct mode of oncogenesis.

### ***hLMS show recurrent and specific genomic instability***

LMS are characterized by their highly rearranged genome (15). Copy number alterations in hLMS appeared more homogeneous than in oLMS both in the merged cohort (**Figure 3**) and between the cohorts, which indicates highly correlated penetrance profiles (**Supplementary Figure S4A**). Recurrent alterations were significantly enriched in hLMS, especially amplification of chromosome 17p12-p11.2 and loss of chr10q, chr13q14, chr17p13 (**Figure 3**). The chr17p12-p11.2 amplified region was not only significantly enriched in hLMS with 31% of hLMS showing an amplification *versus* 7-8% of oLMS, but was also the most frequently amplified region in hLMS (**Figure 4A, Supplementary Table S3A**). Among the genes carried by this region, *MYOCD* was the most frequently amplified (36% of hLMS), and was the most over-expressed gene in this region in hLMS compared to oLMS ( $P < 10^{-7}$  all cohorts considered, **Figures 4A, 4B, Supplementary Table S3B**). *MYOCD* expression was very high in 84% of hLMS (97/115, detailed per cohort in **Supplementary Figure S4B**), whereas it was not expressed or at a very low level in oLMS, even in those with a gain or an amplification (**Figure S4C, Supplementary Table S3B, Figure 4B**).

Interestingly, the well-known tumor suppressors *RBI*, *PTEN* and *TP53* belong to three of the eight most significantly enriched lost regions in hLMS: chr13q14 (88% *versus* 72%),

chr10q23 (87% *versus* 66%) and chr17p13 (69% *versus* 13%) respectively (all cohorts considered) (**Figure 3, Supplementary Table S3B**). When we used the whole genome characterization of the ICGC to further investigate these genetic variations, we found that oLMS tended to be more rearranged ( $P < 0.05$ , **Supplementary Figure S4D**) than hLMS but that the mutational burden was similar between them ( $P = 0.5$ , **Supplementary Figure S4D**). While no COSMIC mutational signature could be associated with the LMS groups, we found a patient-specific predicted contribution of signatures mainly related to defective DNA repair, except for LMS23, which had a disproportionate mutational burden (120 mutations/Mb *versus* less than 1 mutation/Mb for the other) and a mutational profile similar to ultraviolet light exposure, which is coherent with its location on the scalp. (**Supplementary Figure S4E**). Very few genes were identified as recurrently mutated (SNV). However, by combining the different alterations, *i.e.* mutations, structural variants (SV) and losses, we found very frequently altered genes across all ICGC-LMS: *TP53* altered in 100% of cases, *RBI* in 97.4%, *PTEN* in 82%, *ATRX* in 28.2% and *DMD* in 25.6%. (**Table 2, Supplementary Tables S4**).

We found no significant difference in *RBI* and *TP53* global alteration frequencies between the two LMS groups. However, *TP53* presented significantly different alteration patterns. Indeed, oLMS preferentially lost *TP53* completely (9/11, 82%) whereas 64.3% of hLMS (18/28) exhibited different alterations on each allele with losses, missense and frameshift mutations (Fisher's exact test,  $P = 0.01$ , **Figure 4C**). The same trend was observed for *RBI*, without reaching significance (**Figure 4C, Supplementary Table S4A**).

*PTEN* was almost exclusively altered by complete gene deletion, regardless of the LMS type (**Table 2, Supplementary Table S4A**). However, although 82% of cases in both groups were altered, its protein expression loss was significantly associated with hLMS (**Figure 4E**).

*ATRX* mutations are described in detail in another paper from our team, in which we reported their characterization in the whole ICGC cohort (including the 39 LMS studied here). We

showed that *ATRX* alteration and *ATRX* protein expression loss are associated with uterine LMS and the oLMS type (**Darmusey *et al.*, 2020**). Accordingly, *ATRX* nuclear localization was significantly enriched in hLMS (**Supplementary Table S4A, Figure 4E**).

*DMD* tended to be more frequently altered in oLMS than in hLMS (45.4% and 17.8%, respectively). Most *DMD* alterations involved SV, which mainly affects the *DMD* long isoforms (**Table 2, Supplementary Table S4A and S4C**). Regardless of *DMD* genomic status, *Dp427m*, its muscle specific transcript isoform, was significantly less expressed in oLMS ( $P = 1.2 \times 10^{-9}$ ), as was *Dp40* ( $P = 1.9 \times 10^{-4}$ ). On the other hand, the expression of *Dp71*, a ubiquitous isoform, was similar in both LMS types ( $P = 0.63$ ) (**Supplementary Table S4A, Figure 4D**). Results were confirmed at the protein level, with a significant association of global DMD expression loss and particularly of Dp427 in the oLMS type (**Figure 4E**).

Therefore, despite having similar alteration frequencies of the two major suppressor genes *TP53* and *RBI*, the mechanistic differences and specific expression enrichments of the two LMS types suggest that their oncogenic processes are different. The main features underpinning this distinction are the amplification and strong expression of *MYOCD* and the loss of PTEN protein in hLMS. Indeed, these specific features of hLMS are related to *SRF/MYOCD*, the main drivers of smooth muscle cell differentiation, given that PTEN also interacts with SRF (27). We tested the hypothesis that the SRF/MYOCD axis could be a driver of hLMS oncogenesis by investigating the therapeutic inhibition of this pathway.

#### ***hLMS can be targeted specifically with an SRF/MYOCD inhibitor***

We studied the impact on cell viability of inhibitors specifically targeting the SRF/MYOCD pathway. CCG-1423, an inhibitor of the SRF/MRTF interaction (28), and CCG-100602, an inhibitor of the SRF/MYOCD interaction (29), were tested on 3 LMS (OC80: hLMS with a

*MYOCD* amplification, OC48: oLMS with a *MYOCD* gain and OC88: oLMS ) and 2 UPS (OC98 and OC110) cell lines (**Figure 5A**).

After 72h of treatment with increasing concentrations of each CCG, cell viability assay showed that all cell lines were sensitive to both inhibitors (IC<sub>50</sub> ranging from 2.56±1.36 µg/mL to 21.41±3.95 µg/mL) (**Figures 5 B and C**). Regardless of their subgroup, LMS were slightly more sensitive to CCG-1423 than UPS, with OC88 reaching significance and being more affected than OC110 (**Figure 5B**). Interestingly, responses to CCG-100602, which is specific to the SRF/*MYOCD* interaction, exhibited three kinds of behavior: OC80 (hLMS; IC<sub>50</sub> = 2.85±1.15 µg/mL) was the most sensitive, OC88 (oLMS; IC<sub>50</sub> = 6.70±0.95 µg/mL) had an intermediate response, and OC48 (oLMS; IC<sub>50</sub> = 19.44±3.88 µg/mL) and the two UPSs (IC<sub>50</sub> = 15.32±3.42 and 19.69±0.67 µg/mL) were the least receptive (**Figure 5C**). Overall, all cell lines had a lower IC<sub>50</sub> with the SRF/*MYOCD* inhibitor than with the SRF/*MRTF* inhibitor. However, the higher responsiveness of hLMS compared to others when SRF/*MYOCD* was inhibited indicates that the oncogenic dependency to the SRF/*MYOCD* axis is stronger in hLMS.

## ***Discussion***

We have identified two groups of LMS with specific transcriptional and genomic alteration profiles, particular clinical features, and specific modes of oncogenesis and cellular origin. Several authors have already identified two or three subtypes of LMS consistently with one group harboring strong smooth muscle differentiation and a homogeneous transcriptomic profile that are similar to hLMS (8–16). However, our study differs from the others. First, we analyzed primary tumors and excluded uterine LMS, unlike most of the other authors (9,11,12,14). Second, we report reproducible clinical descriptions of hLMS and oLMS. hLMS are highly differentiated, preferentially carried by females, low-grade and with an intra-

abdominal location, while oLMS are poorly differentiated, high-grade and located in the extremities. In addition, outcome was poorer in hLMS in the Affymetrix cohort but not in the other cohorts. There are two non-exclusive possible explanations for this: i) group sizes in the ICGC and TCGA studies were not balanced with an under-representation of oLMS cases, in contrast with the Affymetrix cohort; ii) retroperitoneal LMS are known to have a longer survival than other STS in general (some over 10 years) and to develop late metastases (30), so the follow-up could be too short, leading to an underestimation of the rate of metastasis in hLMS. Furthermore, we conducted an original integrative analysis of mRNA, miRNA, copy numbers, mutations and breakpoints, so we were able to better characterize each LMS group and make new biological findings about these tumors.

Our data show that the over-expression of smooth muscle-related genes in hLMS (compared to oLMS) (e.g. *MYH11*, *TAGLN*, *ACTA2* etc) is probably triggered by MYOCD, as previously demonstrated by Pérot *et al.* (10). *MYOCD* was found to be over-expressed in more than 84% of hLMS following genetic amplification in 36% of cases. To enhance SM differentiation, MYOCD needs to co-operate with an ubiquitous transcription factor (TF), SRF (31), which regulates the expression of targeted genes by binding to an element known as the CArG-box which is located upstream of smooth muscle (SM) contractile genes (32,33). Accordingly, we found a high enrichment in predicted SRF binding sites (*in silico* and ChIP-seq) in over-expressed hLMS gene promoters. Moreover, Dp427, a DMD isoform, which is under the control of MYOCD (34), is nearly always expressed at the membrane in hLMS regardless of *DMD* genomic status, unlike in oLMS in which it is no longer expressed. As the longest DMD isoform loss at the membrane is highly recurrent in other myogenic diseases (35), its presence in the membrane might be needed in hLMS. Further investigations in hLMS are now necessary to better understand its role. Given the presence of smooth muscle active histone marks in over-expressed hLMS genes and their closer similarity to normal blood vessels than

to viscera smooth muscles, we hypothesize that hLMS have a vascular SMC (vSMC) origin rather than arising from an acquired phenotype that triggers metastatic development (10).

The cellular origin of oLMS appears to be quite different. oLMS showed many regulatory and functional features (active histone marks, many TF binding sites predicted from a cell line showing an epithelial morphology and EMT-related terms) associated with fibroblasts, adipocytes, mesenchymal stem cells (MSC) and epithelial cells, and were spread among normal lung, adipose and breast tissues. Therefore, they could derive i) from the de-differentiation of cells from their location; ii) directly from circulating or local MSC; iii) from fusion between circulating or local MSC with a cell from the tumor site (36). Whatever their origin, this would explain the hyper-activation of the unfolded protein response observed in oLMS, which might allow the cells to adapt to the external (undifferentiated phenotype in a specialized environment) or internal (managing extra material after fusion) micro-environment (37). The heterogeneity observed among patients with oLMS and the difficulty to define a unique oncogenesis might be due to their heterogeneous cellular origin.

A novel finding was that hLMS are not only contractile and differentiated but are also proliferative, with migratory features revealing the co-existence of contractile and synthetic phenotypes. These characteristics are probably inherited from the specificity of vSMC, which have highly plastic phenotypes and can cover a wide spectrum of phenotypes from synthetic to contractile (38). Indeed, among the most expressed hLMS genes, we found markers of both phenotypes also highly expressed in blood vessel samples that could represent the natural mixture of vSMC, spanning the phenotypic continuum in these samples. The synthetic phenotype is sustained by the propensity of hLMS to proliferate via strong enhancement of the cell cycle, as suggested by the significant over-expression of *E2F1*, the enrichment of up-regulated hLMS genes in *E2F/RB1* targets, *E2F7* binding sites and cell cycle functional related terms specific to hLMS. This is contradictory with the suggestion of Hemming *et al.*



(14), who considered that all LMS possess this feature. It is probably due to the low number of “other” LMS that they had in their different cohorts when comparing LMS with other STS, then highlighting what they considered to be their “conventional” characteristics. This hyper-activation arises in a context where alteration of the tumor suppressors *TP53*, *RBI* and *PTEN*, is altered equally in hLMS and oLMS but acquired through different preferential mechanisms, as shown by the genetic analysis, may boost proliferation and cell survival in a non-specific manner. Moreover, the PTEN protein is specifically totally absent in hLMS. Recently, it was demonstrated that PTEN is involved in SMC differentiation through direct interaction with SRF (27). In fact, the SRF-regulating abilities of SMC are dual: they control the expression of both smooth muscle (SM) contractile genes, depending on MYOCD, and growth-related immediate early genes (IEG) (32), depending on ELK1. Horita and colleagues showed that in the nucleus, PTEN is directly linked to SRF and helps it to link only to SM gene CArG-Boxes (27), and that PTEN is translocated into the cytoplasm upon forced SMC switch toward proliferation, which in turns increases IEG gene expression. Therefore, the total absence of PTEN in hLMS may allow SRF to be linked with both SM genes and IEG CArG-Boxes, so SRF may express SMC contractile and proliferative genes. However, the large amount of MYOCD may compete with the other SRF interactors and lead to the observation of a significantly lower expression of targets of the ETS-family factors in hLMS than in oLMS. Nevertheless, it should be remembered that by comparing two tumor types, the activity of ETS-related transcription in hLMS may be under-estimated.

The interplay between the two phenotypes may require a fine-tuned regulation which could be partly ensured by miRNAs, as suggested by miRNA profiling analysis. Interestingly, the SRF/MYOCD complex targets all over-expressed miRNAs in hLMS, either directly upon binding to the CArG-boxes present in their promoters (22,39) or indirectly by targeting their host gene, as in *MIR28* and *LPP*. miRNAs deregulation in hLMS could, at the same time,

strengthen the contractile phenotype through a feed-forward loop (*MIR143/MIR145* (39) over-expression) and inhibition of proliferation (*MIR28-5p* over-expression as in colon cancer (23)), while maintaining the synthetic phenotype by impairing contractility (*MIR1* overexpression (22)), promoting migration (over-expression of *MIR28-3p* as in colorectal cancer (23), and of its host gene, *LPP*, as in differentiated LMS (10)) and increasing proliferation (*MIR455*, *MIR199a* and *MIR503/MIR424* under-expression as in pulmonary artery SMC (24,25) and in bladder SMC (26)). We also observed a global repression of the *DLK1-DIO3* miRNAs cluster, which is highly specific to hLMS and papillary thyroid carcinomas. Its predicted target genes are involved in vasculature development and cell migration in both diseases (40), so it is probably involved in this dual phenotype. However, this cluster involves around 50 miRNAs with different functions in different cellular contexts (41), so understanding how this repression actually impacts hLMS biology will require further investigations.

Altogether, our findings suggest that hLMS originate from vSMC that do not achieve terminal differentiation, retain a remarkable degree of plasticity, probably grow in a maintained differentiated state (38,42) and take advantage of the enhanced contractile apparatus to migrate (10). Our data show that many antagonists of vSMC differentiation are present in hLMS and that their contractile abilities appear to be essential for the oncogenesis of hLMS. In turn, this suggests that over-expression of *MYOCD* is positively selected and that it could be the event that triggers tumorigenesis.

Loss of PTEN might be a favorable event for hLMS growth, and targeting the Pi3k/AKT/mTOR pathway in LMS (mostly probable hLMS), which is physiologically inhibited by PTEN, was thought to be promising (43). Subsequently, however, it was demonstrated to induce resistance (44). Thus, targeting downstream of this pathway with an SRF/MYOCD inhibitor could overcome this resistance. We thus conducted functional

inhibition assays with SRF inhibitors which showed greater efficiency on hLMS than on oLMS or UPS. Moreover, the specific inhibitor of the MYOCD/SRF interaction, which is specific to SMC, showed greater efficiency than the MRTF/SRF inhibitor, which is more specific to skeletal muscle.

In conclusion, effective treatments for hLMS and oLMS are more likely to be developed if these two entities can be properly differentiated. In this regard, the SRF/MYOCD axis is a promising target in hLMS. We now need to probe the action of an SRF/MYOCD inhibitor in hLMS to pave the way for the efficient targeted treatment of LMS.

### ***Material & Methods***

#### ***Tumor samples and histological classification***

Two hundred seventy-eight out of the 387 complex genetics sarcomas (5,45), the 60 GIST (46), and the 58 synovial sarcomas (47) are part of cohorts previously described (**Supplementary Table S5A**).

Fifty-nine leiomyosarcomas are part of the ICGC program (International Cancer Genome Consortium), for which constitutional DNA and tumor DNA/RNA were available.

All cases were systematically reviewed by expert pathologists from the French Sarcoma Group according to the World Health Organization recommendations (48).

LMS clinico-pathological data and patient information are summarized in **Supplementary Tables S6**.

#### ***Access to data***

Genomic and expression arrays will be publicly available on Gene Expression Omnibus (GEO) under accession (GSE159847, GSE159848, GSE159849 from the 2021-10-29 and accessible before upon request.

ICGC Whole-Genome sequencing and RNA sequencing data for the 59 LMS are available at <https://dcc.icgc.org/projects/LMS-FR>.

Database accession number for data relative to samples previously published are presented in **Supplementary Tables S5**.

The code is under verification in OCEANCODE (provisional DOI:10.24433/CO.0299110.v1)

### ***TCGA data***

Clinical, gene expression and copy number data from 75 leiomyosarcomas were obtained from UCSC cancer genome browser (<https://genome-cancer.ucsc.edu/>) (49) and xenaBrowser (50). We used RNA-seq gene-level transcription estimates, as in  $\log_2(x+1)$  transformed RSEM normalized count from SARC project (version 2015-02-24) and GTEX+TCGA combined data (version 2016-04-12), mature miRNA strand expression (version 2017-09-08) and GISTIC2 thresholded gene-level copy number variation (CNV, version 2017-09-08). For PANCAN miRNA-seq data, we used the batch corrected (version 2016-12-29).

### ***Normalization of Affymetrix and Agilent micro-arrays and gene selection***

We used 87 samples analyzed on Agilent and Affymetrix platforms (**Supplementary Table S5A**). We selected the genes with Pearson's correlation coefficient (PCC) with itself between chips over 0.8 or better than with any other genes in both experiments. We then normalized gene expression first in separate experiments and then on a merged dataset by applying quantile normalization (preprocessCore R package (51)). We harmonized the expression between the platforms by gene expression median centering in each experiment and then adding the mean of the experiment medians. Details are presented in supplementary Methods.

### ***Gene module clustering***

To define groups of co-expressed genes, we computed pairwise Pearson's correlation coefficient (PCC) of gene expression with variance  $> 2$  across patients. We built a graph of co-expression with correlated genes ( $PCC > 0.7$ ) and search for communities using *edge.betweenness.community* from igraph R package (52).

### ***Patient classification and clinical associations***

We computed centroids (7) for hLMS and oLMS using the 1672 differentially expressed genes detected in the Affymetrix cohort. Distance to centroids was computed as 1 - Spearman's correlation coefficient for each patient from all three cohorts. Patient classification was performed using the mclust R package (53). We selected the Gaussian mixture distribution estimation that best fitted the hLMS centroid distance distribution (maximization of Bayesian Information Criterion).

Clinical enrichment significance was performed using Fisher's exact test for categorical data comparing one category to the others and Wilcoxon's test for continuous data.

Survival analysis was performed using the survival R package (54) by fitting a simple Kaplan Meier model and we set the significance at log-rank test p-value < 0.01. Survival curves were plotted with survminer (55).

### ***Sample clustering and PCA analysis***

In all cases concerning unsupervised clustering, samples were clustered using *PCA* and *HCPC* functions from the FactorMiner R package (56) and were visualized using the pheamap R package (57). PCA analysis on ICGC and TCGA miRNA transcriptome were computed using the *prcomp* R function and visualized using the ggbiplot R package (58). We used the R package Rtsne (59) to visualize GTEX data with parameters `dims=2` `perplexity=100` and `max_iter=1000`.

### ***Differential expression analysis***

mRNA and miRNA differential expression analyses were performed with classical methods as detailed in **Supplementary Methods**.

### ***miRNA-mRNA interaction analysis***

miRNA data acquisition and pre-treatments are detailed in **Supplementary Methods**. The MiRComb R package (60) was used to integrate miRNA, mRNA expression data and

experimentally validated miRNA-mRNA interactions from miRecords v4 (61) and miRTarBase v7.0 (62). We retrieved 6262 known interactions which represent interactions between 30 DE pre-miRNAs and 3850 genes. Pre-miRNAs expression was estimated by averaging signals from derived mature miRNA. We kept interactions for which mRNA and miRNA had a hLMS/oLMS absolute log Fold Change (logFC) > 1, a *limma* p-value < 0.01, a significant Pearson's anti-correlation (adjusted p-value < 0.01) and were described in at least one of the two databases.

### ***Functional enrichment and mapping***

Modules of co-expressed genes were analyzed using the *enricher* function from the ClusterProfiler R package (63) with the Molecular Signatures Database version v6 (MSigDB)(64). Significance threshold of hypergeometric test FDR adjusted p-value: < 0.05.

Differentially expressed genes were analyzed using command line version of GSEA software (version 3.0)(64) and MSigDB v6. We submitted the gene list ranked by hLMS/oLMS t-scores to the *xtools.gsea.GseaPreranked* function with default parameters. Significance threshold on permutation test FDR-adjusted p-value: 0.05. For the sake of clarity, only terms with adjusted p-values < 0.01 are reported. Enrichments for regulatory elements in groups of over- and under- expressed genes were performed on the iCistarget webserver (<https://gbiomed.kuleuven.be/apps/lcb/i-cisTarget/>)(65). Significance threshold of normalized enrichment score (NES) > 3 by default. Annotations related to position weight matrix predictions from the same transcription factors were regrouped.

We used the GSA webserver (<https://gsan.labri.fr/>)(19) with default parameters to exhaustively annotate genes with the most precise Gene Ontology term.

### ***CNV analysis***

Acquisition of copy number data for 84 Affymetrix cohort patients (**Supplementary Table S5B**) and 39 ICGC cohort patients is detailed in Supplementary methods.

Alteration recurrence was estimated by computing the frequency of each event (homozygous, heterozygous deletion, gain of one copy and amplification, *i.e.* gain of four copies or more), *i.e.* the number of a given event divided by the total number of patients (missing data being discarded). To evaluate alteration enrichment in each LMS group, losses were grouped in homo- and heterozygous deletions and gains, gains and amplifications (Fisher's exact test  $p$ -value  $< 0.01$ ). We computed enrichment for each type of event in the 291 cytobands by comparing, the number of significantly altered genes defined above for each band (Fisher's exact test corrected with Holm's method  $< 0.01$ ). If more than one type of event was enriched, the most significant was kept.

### ***Mutation analysis***

Somatic variants were detected from 59 whole genome-sequenced ICGC tumor/normal paired frozen samples (HiSeq2000 Technology, Illumina Inc., San Diego, CA, USA). Read cleaning, mapping (Human Genome version hg19) and detection of variants are detailed in **Supplementary Methods**.

We analyzed somatic mutations patterns using the MutationalPatterns R package (66). We first generated a 96 tri-nucleotide mutation count matrix per patient which we compared to the 30 COSMIC signatures v3.1 (67). We kept signatures with cosine similarity  $> 0.75$  and computed the optimal contribution that best explained the observed mutational profiles in patients.

Tumor mutation burden was computed using the total number of somatic variants divided by the total length of human genome version hg19 (22 autosomal and 2 sexual chromosomes).

### ***Alterations verification strategy***

For the ICGC cohort, *ATRX*, *TP53*, *RBI*, *PTEN* and *DMD* sequences for each case obtained by whole genome sequencing were entirely screened using the Integrative Genomics Viewer (IGV\_2.6.3 (68)) to search for alterations possibly missed by the detection algorithms used.

All SV were verified on gDNA by PCR and Sanger sequencing. MS/NS mutations not found in either WGseq or RNAseq and all FS were verified at both DNA and RNA levels by PCR and RT-PCR, respectively, followed by Sanger sequencing. For samples with enough material left, fusion transcripts detected by RNA-seq were verified by RT-PCR and Sanger sequencing.

### ***Inhibitors***

To assess inhibition of interaction between SRF and MRTF or MYOCD upon cell viability, we performed an MTT assay using either CCG-1423 (10010350) or CCG-100206 (10787) (Bertin Bioreagent, Montigny le Bretonneux, France) on LMS and UPS cells.

Additional information about sample selection, DNA and RNA extraction, expression and genomic arrays, PCR and RT-PCR, sequencing, FISH, immunohistochemistry, immunofluorescence, cell culture, cytotoxicity assay and analyses can be found in the **Supplementary Material and Methods** section.

### ***Acknowledgements:***

The authors would like to thank the Centre Nacional d'Anàlisi Genòmica (CNAG, Barcelona, Spain) for WG and RNA sequencing services and the Genomics Unit at the Centro de Regulación Genómica (CRG, Barcelona, Spain) for assistance with the smallRNAseq services. The results shown here are partly based upon data generated by the TCGA Research Network: <https://www.cancer.gov/tcga>. We are grateful to the French Sarcoma Group for tumor banks and associated clinical annotations and to Jean-Baptiste Courrèges. The following French cancer centers also participated in this study: Centre Paul Papin (Angers), Centre Oscar Lambert (Lille), Institut Paoli Calmettes (Marseille). Bioinformatics analyses were performed on the Core Cluster of the Institut Français de Bioinformatique (IFB) (ANR-11-INBS-0013).





## Figures and Tables

| Feature                           | Test                      | Affymetrix |      |                            | ICGC + TCGA |      |                             |
|-----------------------------------|---------------------------|------------|------|----------------------------|-------------|------|-----------------------------|
|                                   |                           | hLMS       | oLMS | p-value                    | hLMS        | oLMS | p-value                     |
| Differentiation (%)               | Well (vs Poor)            | 88         | 24   | $3.87 \times 10^{-9}$ (+)  | 84          | 41   | $1.83 \times 10^{-5}$ (+)   |
| Grade (%)                         | Low (vs High)             | 58         | 24   | $6.51 \times 10^{-4}$ (+)  |             |      |                             |
| Sex (%)                           | F (vs M)                  | 76         | 48   | 0.003 (+)                  | 68          | 41   | 0.007 (+)                   |
| Location (%)                      | Internal trunk (vs other) | 60         | 7    | $8.48 \times 10^{-9}$ (+)  | 82          | 27   | $1.53 \times 10^{-7}$ (+)   |
| Mitotic counts (median)           | Ranks                     | 17         | 24.5 | 0.009 (-)                  | 11          | 35   | 0.0006 (-)                  |
| Gene expression variance (median) | Ranks                     | 0.7        | 1    | $2.90 \times 10^{-13}$ (-) | ICGC        |      |                             |
|                                   |                           |            |      |                            | 0.25        | 0.36 | $< 2.2 \times 10^{-16}$ (-) |
|                                   |                           |            |      |                            | TCGA        |      |                             |
|                                   |                           |            |      |                            | 0.45        | 0.9  | $< 2.2 \times 10^{-16}$ (-) |

**Table 1:** Clinical enrichment and gene expression homogeneity in 42 hLMS vs 56 oLMS from Affymetrix cohort and 73 hLMS vs 29 oLMS in combined ICGC (28 vs 11) and TCGA (45 vs 18). (%) indicates that numbers in hLMS and oLMS columns are percentages of patients annotated with first feature (Well: well differentiated, Low: grade 1 + 2, F: female, Internal trunk). M: Male, other: Extremities, Trunk wall, limbs. The p-value was computed using Fisher's Exact test. Otherwise the median is reported, and the p-value was obtained with Wilcoxon's test. (+) next to p-values indicates a significant enrichment in hLMS while (-) indicates a significant enrichment in oLMS.

| <b>Group</b> | <b>Alterations</b> | <b><i>TP53</i></b> | <b><i>RBI</i></b> | <b><i>PTEN</i></b> | <b><i>ATRX</i></b> | <b><i>DMD</i></b> |
|--------------|--------------------|--------------------|-------------------|--------------------|--------------------|-------------------|
| <b>hLMS</b>  | <b>mutation</b>    | 60.7 (17)          | 21.4 (6)          | 0 (0)              | 7.1 (2)            | 3.6 (2)           |
| <b>oLMS</b>  |                    | 18.2 (2)           | 9 (1)             | 0 (0)              | 27.3 (3)           | 9 (1)             |
| <b>all</b>   |                    | 48.7 (19)          | 17.9 (7)          | 0 (0)              | 12.8 (5)           | 5.1 (3)           |
| <b>hLMS</b>  | <b>SV</b>          | 25 (7)             | 35.7 (10)         | 3.6 (1)            | 7.1 (2)            | 14.3 (4)          |
| <b>oLMS</b>  |                    | 36.4 (4)           | 36.4 (4)          | 0 (0)              | 0(0)               | 36.4 (4)          |
| <b>all</b>   |                    | 28.2 (11)          | 35.9 (14)         | 2.6 (1)            | 5.1 (2)            | 20.5 (8)          |
| <b>hLMS</b>  | <b>loss</b>        | 89.3 (25)          | 92.9 (26)         | 82.1 (23)          | 7.1 (2)            | 3.6 (1)           |
| <b>oLMS</b>  |                    | 90.9 (10)          | 81.8 (9)          | 81.8 (9)           | 18.1 (2)           | 0 (0)             |
| <b>all</b>   |                    | 89.7 (35)          | 89.7 (35)         | 82 (32)            | 10.2 (4)           | 2.6 (1)           |
| <b>hLMS</b>  | <b>total</b>       | 100 (28)           | 100 (28)          | 82.1 (23)          | 21.4 (6)           | 17.8 (5)          |
| <b>oLMS</b>  |                    | 100 (11)           | 90.9 (10)         | 81.8 (9)           | 45.5 (5)           | 45.5 (5)          |
| <b>all</b>   |                    | 100 (39)           | 97.4 (38)         | 82 (32)            | 28.2 (11)          | 25.6 (10)         |

**Table 2:** Summary of genetic alterations in 39 ICGC patients for *TP53*, *RBI*, *PTEN*, *ATRX* and *DMD*. Alterations are categorized as follows: mutation: missense, nonsense, frameshift, non-FS, splicing, SV: structural variant, loss: loss of at least one allele, total: number of patients carrying at least one alteration. Numbers indicate percentage of patients harboring the alteration; the actual number are reported between brackets.

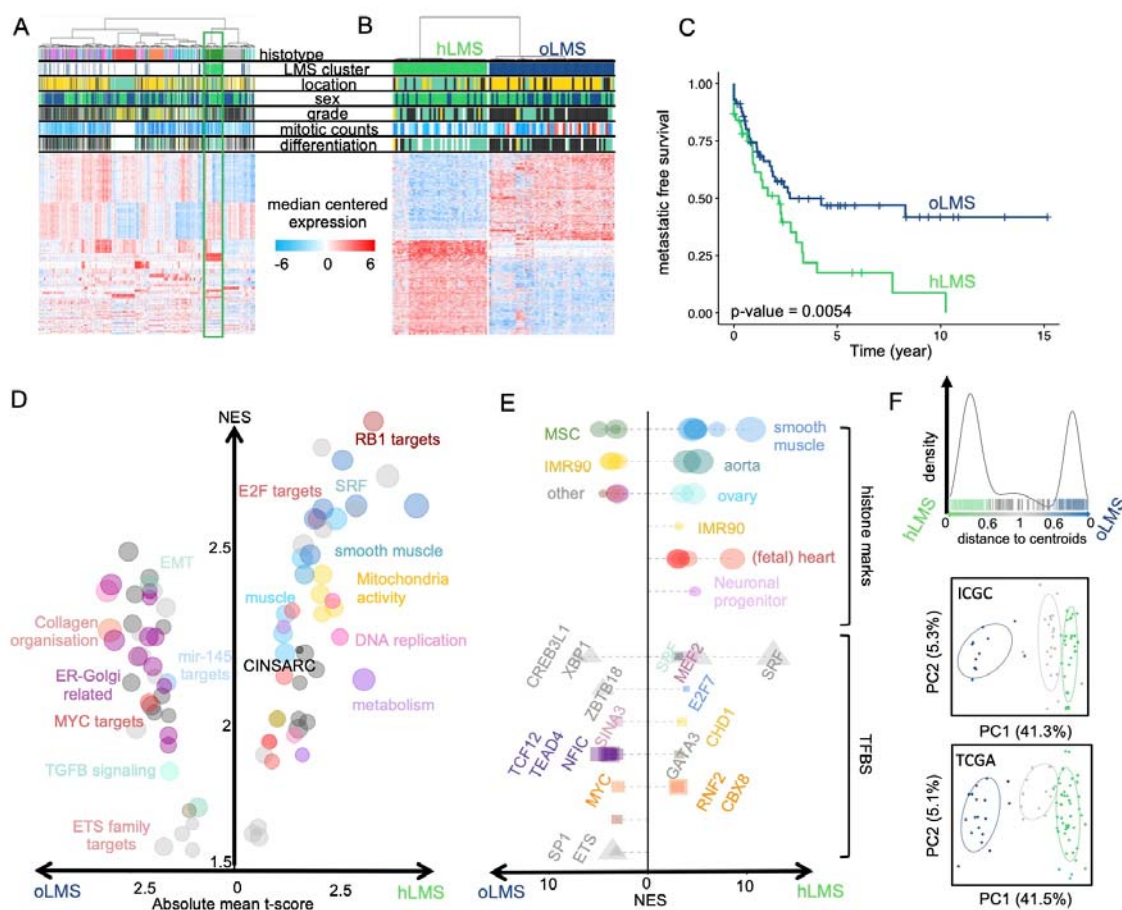

**Figure 1: Transcriptional analysis and patient classification**

**A-B.** Heatmap showing clustering of 555 sarcoma patients and 455 genes (**A**) and 98 LMS patients and 1672 differentially expressed genes between hLMS and oLMS (**B**). Patients were clustered using HCPC method and genes are grouped by co-expression modules.

Color scheme. Histotype: green forest: leiomyosarcomas, red: GIST, pink: undifferentiated sarcomas, orange: myxoid liposarcomas, blue: dedifferentiated sarcomas, grey: synovial sarcomas, turquoise: other sarcomas. Location: yellow: extremities, green: internal trunk, black: trunk wall. Sex: green: female, blue: male. Grade and differentiation: yellow: 1, green: 2, black: 3. Mitotic count: blue to red: from low to high: **A** – 0 to 120, **B** - 0 to 60. Cluster: green: hLMS, blue: oLMS.

**C.** Kaplan-Meier metastasis-free survival analysis in hLMS and oLMS.

**D.** GSEA analysis on z-scores obtained from hLMS / oLMS gene expression comparison.

Each dot is an enriched term (FDR < 0.01); size corresponds to number of genes involved; x-axis contains mean z-score of all genes annotated in given term and y-axis corresponds to GSEA NES score. Related terms colored the same way.

**E.** i-Cistarget analysis of 843 under- and 800 over-expressed genes in hLMS relative to oLMS. The x-axis represents NES score obtained for over-expressed genes from 0 toward right and for under-expressed genes from 0 to left. The left and right parts are independent; the enriched features were clustered on the y-axis according to the cell type or tissue they were analyzed from. Histone modifications are only active marks of transcription (H3K4me1, H3K4me3, H3K27ac and H3K9ac). Detailed legends for E-F are available in **Supplementary Table S1**.

**F.** Top panel: distance distribution to centroids (x-axis) computed from transcriptional signature for ICGC and TCGA patients (bars on x-axis). Colors correspond to cluster assignment: patients with a distance lower than 0.6 to one of the centroids were assigned to corresponding centroid (green: hLMS, dark blue: oLMS), while patients with intermediate value were not classified (light grey).

Middle and bottom panels: PCA analysis using transcriptional signature genes in ICGC and TCGA cohorts. Each point is a patient, green: hLMS, dark blue: oLMS and light grey: not classified. X-axis and y-axis represent respectively principal components 1 and 2 and their associated representation of variance.

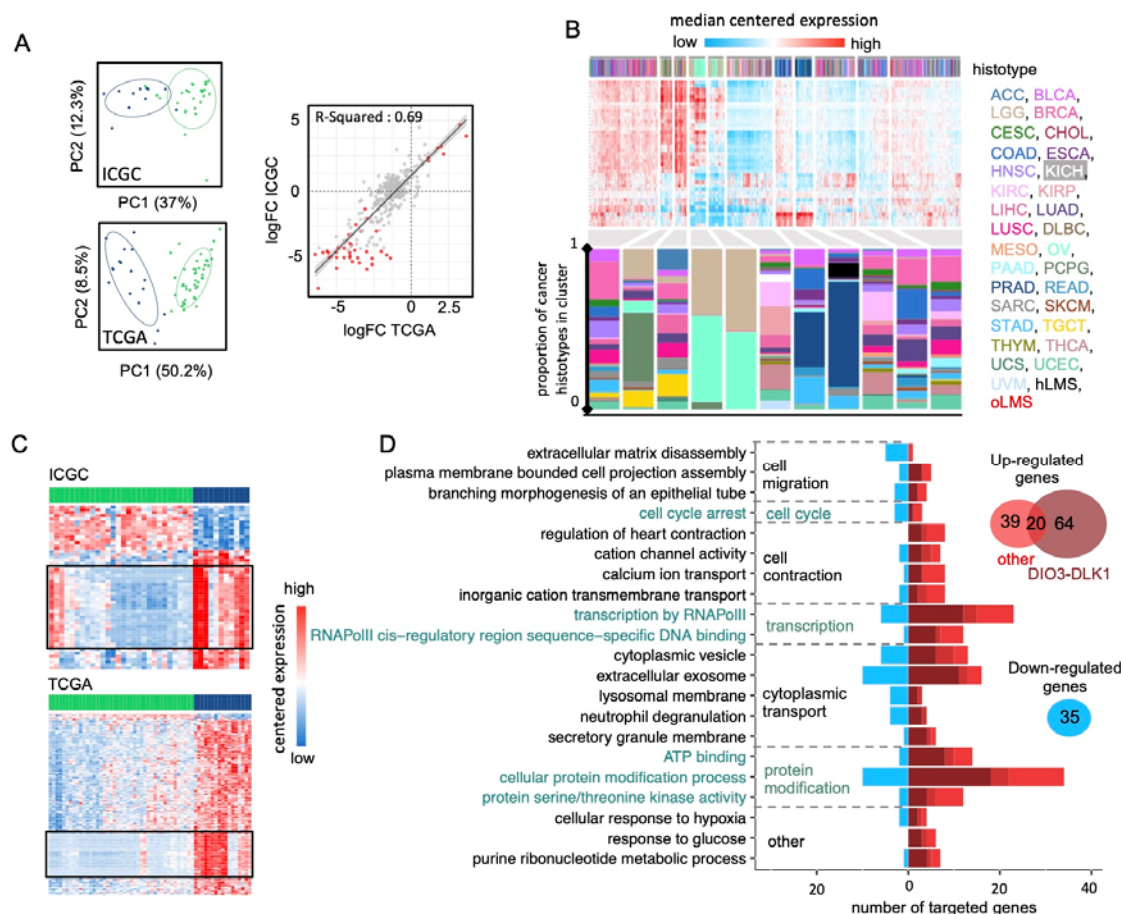

**Figure 2: Analysis of miRNAs expression**

**A.** Left panel: PCA obtained from expression of 484 mature miRNAs in 39 ICGC patients (top) and of 475 mature miRNAs in 60 TCGA patients (bottom). Colors correspond to hLMS (green, ICGC: 28 patients, TCGA: 43 patients) and oLMS (blue, ICGC: 11 patients, TCGA: 17 patients). First two principal components are shown with percentage of variance they capture. Right panel: Scatterplot showing correlation between hLMS/oLMS LogFC in ICGC (y-axis) with TCGA (x-axis). Each dot represents a mature miRNA (347 expressed in both cohorts) and red color indicates 71 significant mature DE miRNAs in both cohorts. Line represents linear regression with interval confidence in shaded grey.

**B.** HCPC clustering on the 41 mature miRNAs differentially expressed in LMS subtypes across the 9564 PANCAN samples. Heatmap showing median-centered miRNA expression (low: blue to high: red). Column annotation represents histotype of samples for which colors are specified at bottom of figure. Composition in histotype of clusters is detailed in bar plot below heatmap. The y-axis corresponds to the proportion.

**C.** Heatmap showing differentially expressed miRNAs (rows) in ICGC (top, 55 miRNAs) and TCGA (bottom, 243 miRNAs). Column annotation corresponds to hLMS (green) and oLMS (blue). Expression values are median-centered (low: blue to high: red). Black rectangles highlight mature miRNAs from DIO3-DLK1 miRNA cluster (ICGC: 26, TCGA: 63, 25 in common).

**D.** Functional terms mapped to 158 miRNA targeted genes. The x-axis indicates number of down-regulated (toward left in blue) and up-regulated (toward right in dark red if targeted with only miRNAs from DIO3-DLK1 cluster, medium red if targeted by both miRNAs from DIO3-DLK1 cluster and other miRNAs and light red if targeted by other miRNAs) genes annotated with the term (y-axis).

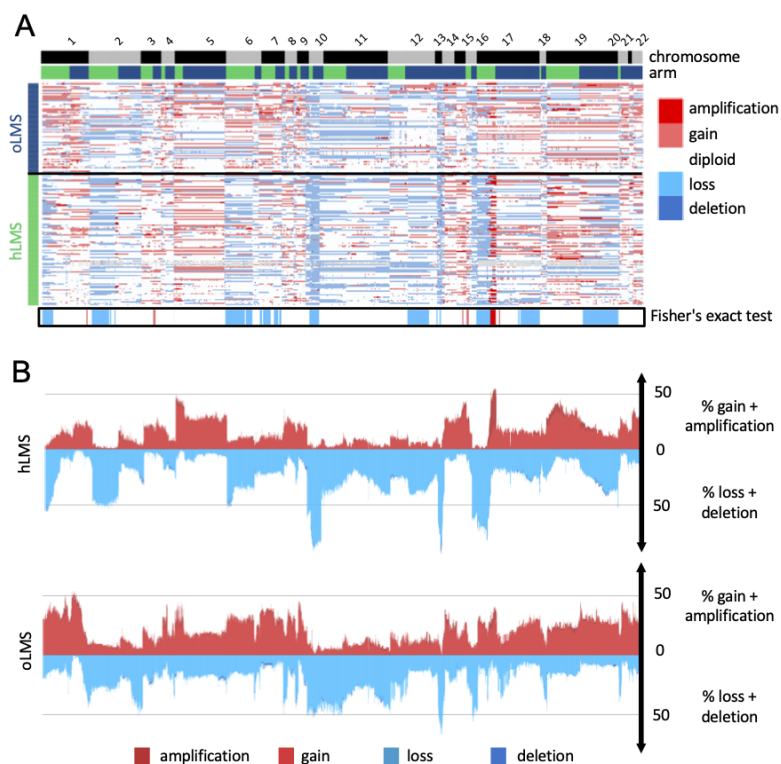

**Figure 3. Copy number analysis of 7479 genes in LMS merged cohort (84 Affymetrix (CGH), 39 ICGC (WGS) and 62 TCGA (CGH) patients).**

**A.** Heatmap showing copy number of genes (columns) in each patient (rows). Patients grouped according to LMS type (hLMS: green, oLMS: blue). Annotations above heatmap show chromosomes from 1 to 22 alternating grey and black and arms (p: green, q: blue). Annotation below shows significantly enriched events in hLMS. Color scheme is same for copy number and enrichment: homozygous deletion: dark blue, heterozygous deletion: light blue, normal: white, light red: gain of one copy, dark red: gain of 4 or more copies.

**B.** Penetrance plot. Percentage (y-axis) of gain (red) and loss (blue) events are represented in hLMS (top panel) and oLMS (bottom panel). Each position on x-axis is a gene that corresponds to genes in A.



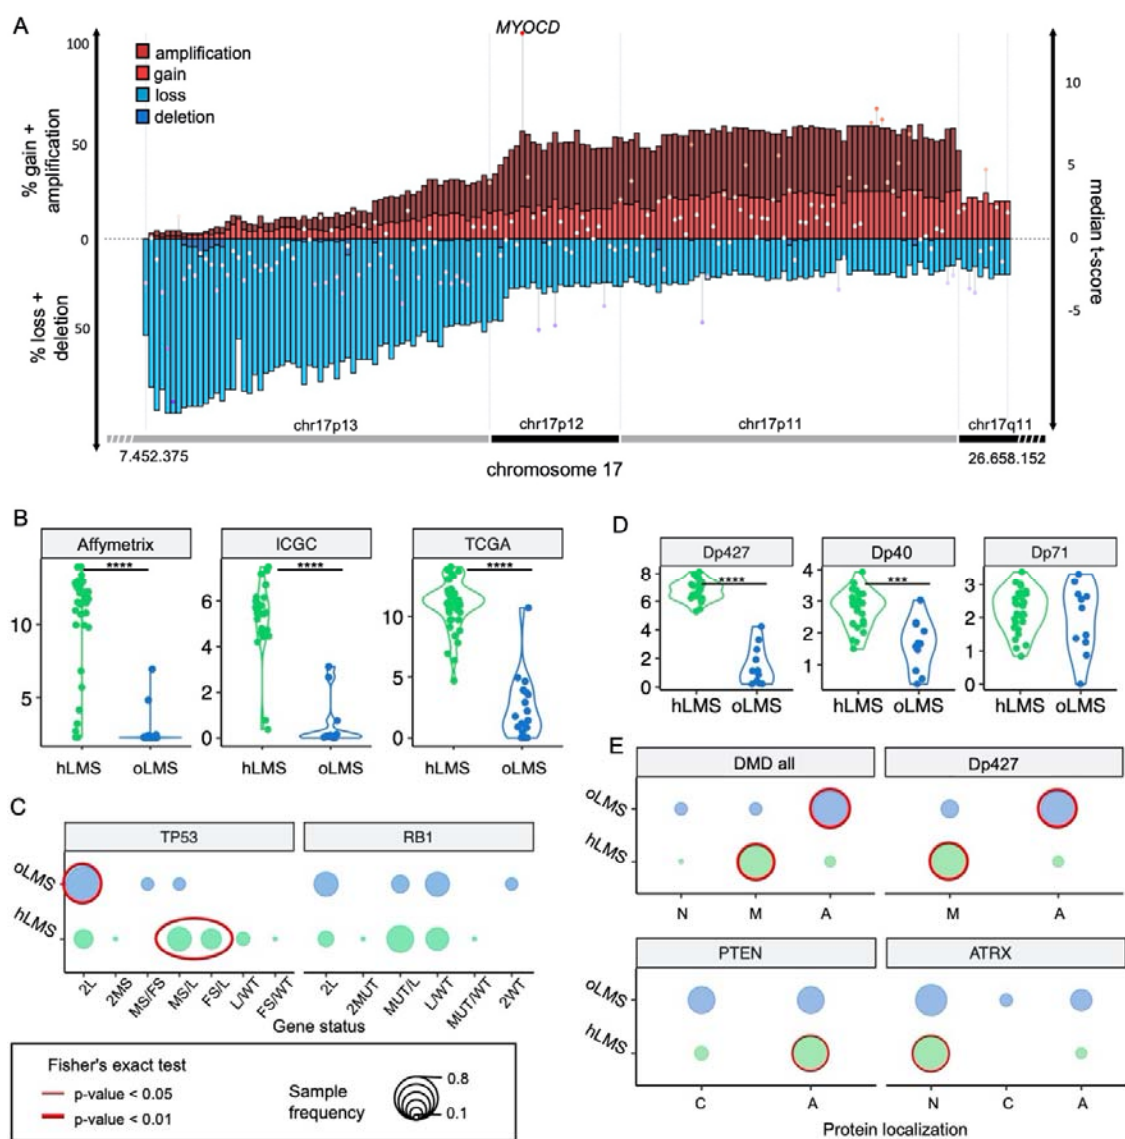

**Figure 4: Zoom on genes of interest**

**A.** Zoom on chr17p13-11/q11 genomic region (x-axis) penetrance profile containing *MYOCD*. Left y-axis indicates percentage of loss (light blue), deletion (dark blue), gain (light red) and amplification (dark red); right y-axis shows hLMS/oLMS median t-scores (from the three cohorts). Each gene represented by bar (penetrance) and dot (t-score).

**B and D.** Violin plots showing *MYOCD* gene expression and *DMD* isoform expression (RNA level) in hLMS and oLMS in the three cohorts respectively. \*\*\*\* indicates a t-test p-value <  $10^{-7}$ , \*\*\* p-value <  $10^{-3}$ .

C. Distribution of *TP53* and *RBI* allele status in hLMS and oLMS. Dot sizes correlate with percentage of patients in LMS group harboring defined status. Cases with biallelic inactivation of *TP53* are compared between groups (2L+2MS: only one mechanism altering both alleles *versus* MS/FS+MS/L+FS/L: two different mechanisms altering each allele): red oval indicates Fisher test p-value < 0.01. L: loss, MS: missense, FS: false sense, MUT: MS or FS, WT: wild-type, if 2 is specified, both alleles are concerned.

E. Cellular distribution of DMD, PTEN and ATRX proteins in hLMS and oLMS. For DMD, localization of its Dp427 isoform is also presented. A: absent, N: nuclear, M: membranous, C: cytoplasmic. Dot sizes correlate with percentage of patients in LMS group harboring defined localization. Red circle indicates Fisher test p-value < 0.01 (bold) and < 0.05 (thin).

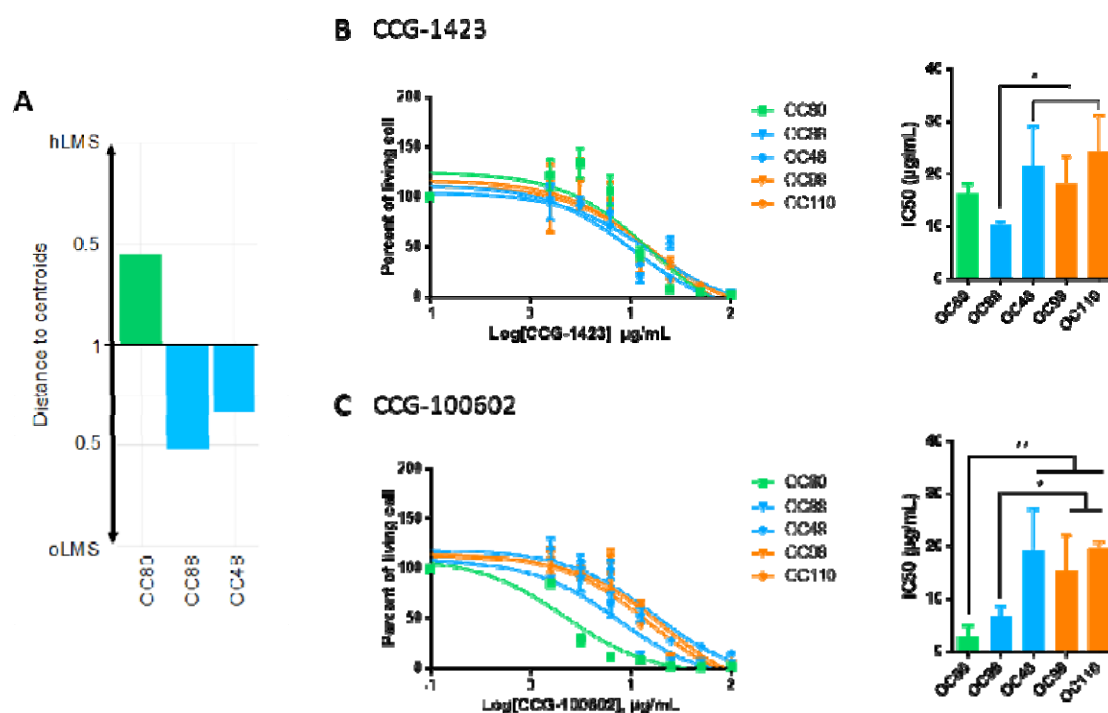

**Figure 5: SRF/MYOC D inhibitor can specifically target hLMS**

**A.** Distance to centroids determining h/oLMS status on 1672 genes of 3 LMS cell lines.

**B.** Cytotoxicity curves of CCG-1423, inhibitor of SRF/MRTF axis, on 3 LMS and 2 UPS cell lines, using MTT assay after 72h of treatment at increasing concentrations (from 1.5 to 100µg/mL). First graph represents one of three experimentations used to determine IC<sub>50</sub> with GraphPad. Second graph shows IC<sub>50</sub> (mean ± s.d.; N = 3 independent assays).

**C.** Cytotoxicity curves of CCG-100206, inhibitor of SRF/MYOCD axis, on same cell lines, using MTT assay after 72h of treatment at same increasing concentrations. First graph represents one of three experimentations used to determine IC<sub>50</sub> with GraphPad. Second graph shows IC<sub>50</sub> (mean ± s.d.; N = 3 independent assay).

\* $p \leq 0.05$ , \*\* $p \leq 0.01$ , \*\*\* $p \leq 0.001$ , p-value was calculated with unpaired t-test for **B** and **C**.

## **References**

1. WHO Classification of Tumours Editorial Board. Soft Tissue and Bone Tumours [Internet]. 5th ed. 2020 [cited 2020 Sep 1]. Available from: <https://publications.iarc.fr/Book-And-Report-Series/Who-Classification-Of-Tumours/Soft-Tissue-And-Bone-Tumours-2020>
2. Judson I, Verweij J, Gelderblom H, Hartmann JT, Schöffski P, Blay J-Y, et al. Doxorubicin alone versus intensified doxorubicin plus ifosfamide for first-line treatment of advanced or metastatic soft-tissue sarcoma: a randomised controlled phase 3 trial. *The Lancet Oncology*. 2014;15:415–23.
3. van der Graaf WT, Blay J-Y, Chawla SP, Kim D-W, Bui-Nguyen B, Casali PG, et al. Pazopanib for metastatic soft-tissue sarcoma (PALETTE): a randomised, double-blind, placebo-controlled phase 3 trial. *The Lancet*. 2012;379:1879–86.
4. Ben-Ami E, Barysaukas CM, Solomon S, Tahlil K, Malley R, Hohos M, et al. Immunotherapy with single agent nivolumab for advanced leiomyosarcoma of the uterus: Results of a phase 2 study: Nivolumab for Uterine Leiomyosarcoma. *Cancer*. 2017;123:3285–90.
5. Chibon F, Lagarde P, Salas S, Pérot G, Brouste V, Tirode F, et al. Validated prediction of clinical outcome in sarcomas and multiple types of cancer on the basis of a gene expression signature related to genome complexity. *Nat Med*. 2010;16:781–7.
6. Perou CM, Sørlie T, Eisen MB, van de Rijn M, Jeffrey SS, Rees CA, et al. Molecular portraits of human breast tumours. *Nature*. 2000;406:747–52.
7. Marisa L, de Reyniès A, Duval A, Selves J, Gaub MP, Vescovo L, et al. Gene expression classification of colon cancer into molecular subtypes: characterization, validation, and prognostic value. *PLoS Med*. 2013;10:e1001453.

8. Nielsen TO, West RB, Linn SC, Alter O, Knowling MA, O'Connell JX, et al. Molecular characterisation of soft tissue tumours: a gene expression study. *The Lancet*. 2002;359:1301–7.
9. Baird K, Davis S, Antonescu CR, Harper UL, Walker RL, Chen Y, et al. Gene Expression Profiling of Human Sarcomas: Insights into Sarcoma Biology. *Cancer Res*. 2005;65:9226–35.
10. Perot G, Derre J, Coindre J-M, Tirode F, Lucchesi C, Mariani O, et al. Strong Smooth Muscle Differentiation Is Dependent on Myocardin Gene Amplification in Most Human Retroperitoneal Leiomyosarcomas. *Cancer Research*. 2009;69:2269–78.
11. Beck AH, Lee C-H, Witten DM, Gleason BC, Edris B, Espinosa I, et al. Discovery of molecular subtypes in leiomyosarcoma through integrative molecular profiling. *Oncogene*. 2010;29:845–54.
12. Guo X, Jo VY, Mills AM, Zhu SX, Lee C-H, Espinosa I, et al. Clinically Relevant Molecular Subtypes in Leiomyosarcoma. *Clinical Cancer Research*. 2015;21:3501–11.
13. Lee Y-F, Roe T, Mangham DC, Fisher C, Grimer RJ, Judson I. Gene expression profiling identifies distinct molecular subgroups of leiomyosarcoma with clinical relevance. *Br J Cancer*. 2016;115:1000–7.
14. Hemming ML, Fan C, Raut CP, Demetri GD, Armstrong SA, Sicinska E, et al. Oncogenic gene expression programs in leiomyosarcoma and characterization of conventional, inflammatory and uterogenic subtypes. *Mol Cancer Res*. 2020;molcanres.0197.2020.
15. Gibault L, Pérot G, Chibon F, Bonnin S, Lagarde P, Terrier P, et al. New insights in sarcoma oncogenesis: a comprehensive analysis of a large series of 160 soft tissue sarcomas with complex genomics. *J Pathol*. 2011;223:64–71.
16. Italiano A, Lagarde P, Brulard C, Terrier P, Lae M, Marques B, et al. Genetic Profiling Identifies Two Classes of Soft-Tissue Leiomyosarcomas with Distinct Clinical Characteristics. *Clinical Cancer Research*. 2013;19:1190–6.
17. Watson S, Perrin V, Guillemot D, Reynaud S, Coindre J-M, Karanian M, et al. Transcriptomic definition of molecular subgroups of small round cell sarcomas: Molecular classification of sarcoma subtypes. *J Pathol*. 2018;245:29–40.
18. Amant F, Coosemans A, Debiec-Rychter M, Timmerman D, Vergote I. Clinical management of uterine sarcomas. *The Lancet Oncology*. 2009;10:1188–98.
19. Ayllon-Benitez A, Bourqui R, Thébault P, Mouglin F. GSA: an alternative to enrichment analysis for annotating gene sets. *NAR Genomics and Bioinformatics*. 2020;2:lqaa017.
20. The Cancer Genome Atlas Research Network, Abeshouse A, Adebamowo C, Adebamowo SN, Akbani R, Akeredolu T, et al. Comprehensive and Integrated Genomic Characterization of Adult Soft Tissue Sarcomas. *Cell*. 2017;171:950-965.e28.

21. Cordes KR, Sheehy NT, White MP, Berry EC, Morton SU, Muth AN, et al. miR-145 and miR-143 regulate smooth muscle cell fate and plasticity. *Nature*. 2009;460:705–10.
22. Jiang Y, Yin H, Zheng X-L. MicroRNA-1 inhibits myocardin-induced contractility of human vascular smooth muscle cells. *J Cell Physiol*. 2010;225:506–11.
23. Almeida MI, Nicoloso MS, Zeng L, Ivan C, Spizzo R, Gafà R, et al. Strand-Specific miR-28-5p and miR-28-3p Have Distinct Effects in Colorectal Cancer Cells. *Gastroenterology*. 2012;142:886-896.e9.
24. Zhou C, Chen Y, Kang W, Lv H, Fang Z, Yan F, et al. Mir-455-3p-1 represses FGF7 expression to inhibit pulmonary arterial hypertension through inhibiting the RAS/ERK signaling pathway. *Journal of Molecular and Cellular Cardiology*. 2019;130:23–35.
25. Hashemi Gheinani A, Burkhard FC, Rehrauer H, Aquino Fournier C, Monastyrskaya K. MicroRNA MiR-199a-5p Regulates Smooth Muscle Cell Proliferation and Morphology by Targeting WNT2 Signaling Pathway. *J Biol Chem*. 2015;290:7067–86.
26. Kim J, Kang Y, Kojima Y, Lighthouse JK, Hu X, Aldred MA, et al. An endothelial apelin-FGF link mediated by miR-424 and miR-503 is disrupted in pulmonary arterial hypertension. *Nat Med*. 2013;19:74–82.
27. Horita H, Wysoczynski CL, Walker LA, Moulton KS, Li M, Ostriker A, et al. Nuclear PTEN functions as an essential regulator of SRF-dependent transcription to control smooth muscle differentiation. *Nat Commun*. 2016;7:10830.
28. Evelyn CR, Wade SM, Wang Q, Wu M, Iñiguez-Lluhí JA, Merajver SD, et al. CCG-1423: a small-molecule inhibitor of RhoA transcriptional signaling. *Mol Cancer Ther*. 2007;6:2249–60.
29. Zhou N, Lee J-J, Stoll S, Ma B, Costa KD, Qiu H. Rho Kinase Regulates Aortic Vascular Smooth Muscle Cell Stiffness Via Actin/SRF/Myocardin in Hypertension. *Cellular physiology and biochemistry*: international journal of experimental cellular physiology, biochemistry, and pharmacology. 2017;44:701.
30. Miettinen M. Smooth muscle tumors of soft tissue and non-uterine viscera: biology and prognosis. *Modern Pathology*. 2014;27:S17–29.
31. Miano JM. Myocardin in biology and disease. *J Biomed Res*. 2015;29:3–19.
32. Miano J. Serum response factor: toggling between disparate programs of gene expression. *Journal of Molecular and Cellular Cardiology*. 2003;35:577–93.
33. Treisman R. Identification of a protein-binding site that mediates transcriptional response of the c-fos gene to serum factors. *Cell*. 1986;46:567–74.
34. Turczyńska KM, Swärd K, Hien TT, Wohlfahrt J, Mattisson IY, Ekman M, et al. Regulation of Smooth Muscle Dystrophin and Synaptopodin 2 Expression by Actin Polymerization and Vascular Injury. *Arterioscler Thromb Vasc Biol*. 2015;35:1489–97.

35. Wang Y, Marino-Enriquez A, Bennett RR, Zhu M, Shen Y, Eilers G, et al. Dystrophin is a tumor suppressor in human cancers with myogenic programs. *Nat Genet.* 2014;46:601–6.
36. Lartigue L, Merle C, Lagarde P, Delespaul L, Lesluyes T, Le Guellec S, et al. Genome remodeling upon mesenchymal tumor cell fusion contributes to tumor progression and metastatic spread. *Oncogene.* 2020;39:4198–211.
37. Yadav RK, Chae S-W, Kim H-R, Chae HJ. Endoplasmic Reticulum Stress and Cancer. *J Cancer Prev.* 2014;19:75–88.
38. Owens GK, Kumar MS, Wamhoff BR. Molecular regulation of vascular smooth muscle cell differentiation in development and disease. *Physiol Rev.* 2004;84:767–801.
39. Vacante F, Denby L, Sluimer JC, Baker AH. The function of miR-143, miR-145 and the MiR-143 host gene in cardiovascular development and disease. *Vascular Pharmacology.* 2019;112:24–30.
40. Geraldo MV, Nakaya HI, Kimura ET. Down-regulation of 14q32-encoded miRNAs and tumor suppressor role for *miR-654-3p* in papillary thyroid cancer. *Oncotarget.* 2017;8:9597–607.
41. Benetatos L, Hatzimichael E, Londin E, Vartholomatos G, Loher P, Rigoutsos I, et al. The microRNAs within the DLK1-DIO3 genomic region: involvement in disease pathogenesis. *Cell Mol Life Sci.* 2013;70:795–814.
42. Alexander MR, Owens GK. Epigenetic Control of Smooth Muscle Cell Differentiation and Phenotypic Switching in Vascular Development and Disease. *Annu Rev Physiol.* 2012;74:13–40.
43. Cuppens T, Annibaldi D, Coosemans A, Trovik J, Haar N ter, Colas E, et al. Potential Targets' Analysis Reveals Dual PI3K/mTOR Pathway Inhibition as a Promising Therapeutic Strategy for Uterine Leiomyosarcomas—an ENITEC Group Initiative. *Clin Cancer Res. American Association for Cancer Research;* 2017;23:1274–85.
44. Fourneau B, Chaire V, Lucchesi C, Karanian M, Pineau R, Laroche-Clary A, et al. Dual inhibition of the PI3K/AKT/mTOR pathway suppresses the growth of leiomyosarcomas but leads to ERK activation through mTORC2: biological and clinical implications. *Oncotarget. Impact Journals;* 2016;8:7878–90.
45. Lesluyes T, Blay J-Y, Schoffski P, Italiano A, Le Cesne A, Debiec-Rychter M, et al. Expression and prognostic significance of PDGF ligands (A, B, C, and D) and PDGFR (A, B, and L) in soft-tissue sarcomas and GIST. *JCO.* 2017;35:11067–11067.
46. Lagarde P, Perot G, Kauffmann A, Brulard C, Dapremont V, Hostein I, et al. Mitotic Checkpoints and Chromosome Instability Are Strong Predictors of Clinical Outcome in Gastrointestinal Stromal Tumors. *Clinical Cancer Research.* 2012;18:826–38.
47. Lagarde P, Przybyl J, Brulard C, Pérot G, Pierron G, Delattre O, et al. Chromosome Instability Accounts for Reverse Metastatic Outcomes of Pediatric and Adult Synovial Sarcomas. *JCO.* 2013;31:608–15.

48. Fletcher C, Bridge JA, Hogendoorn P, Mertens F. WHO Classification of Tumours of Soft Tissue and Bone. 4th ed. Lyon: IARC Press; 2013.
49. Goldman M, Craft B, Swatloski T, Cline M, Morozova O, Diekhans M, et al. The UCSC Cancer Genomics Browser: update 2015. *Nucleic Acids Research*. 2015;43:D812–7.
50. Goldman MJ, Craft B, Hastie M, Repečka K, McDade F, Kamath A, et al. Visualizing and interpreting cancer genomics data via the Xena platform. *Nat Biotechnol*. 2020;38:675–8.
51. Bolstad B. preprocessCore: A collection of pre-processing functions [Internet]. 2019. Available from: <https://github.com/bmbolstad/preprocessCore>
52. Csárdi G, Nepusz T. The igraph software package for complex network research. *InterJournal*. 2006;Complex Systems:1695.
53. Scrucca L, Fop M, Murphy T Brendan, Raftery A E. mclust 5: Clustering, Classification and Density Estimation Using Gaussian Finite Mixture Models. *The R Journal*. 2016;8:289.
54. Therneau TM. A Package for Survival Analysis in R [Internet]. 2020. Available from: <https://CRAN.R-project.org/package=survival>
55. Kassambara A, Kosinski M, Biecek P. survminer: Drawing Survival Curves using “ggplot2” [Internet]. 2019. Available from: <https://CRAN.R-project.org/package=survminer>
56. Lê S, Josse J, Husson F. **FactoMineR**: An R Package for Multivariate Analysis. *J Stat Soft* [Internet]. 2008 [cited 2020 Jun 29];25. Available from: <http://www.jstatsoft.org/v25/i01/>
57. Kolde R. Pheatmap: pretty heatmaps [Internet]. 2019. Available from: <https://CRAN.R-project.org/package=pheatmap>
58. Vu VQ. ggbiplot: A ggplot2 based biplot [Internet]. 2011. Available from: <http://github.com/vqv/ggbiplot>
59. van der Maaten L, Hinton G. Visualizing non-metric similarities in multiple maps. *Mach Learn*. 2012;87:33–55.
60. Vila-Casadesús M, Gironella M, Lozano JJ. MiRComb: An R Package to Analyse miRNA-mRNA Interactions. Examples across Five Digestive Cancers. Campbell M, editor. *PLoS ONE*. 2016;11:e0151127.
61. Xiao F, Zuo Z, Cai G, Kang S, Gao X, Li T. miRecords: an integrated resource for microRNA-target interactions. *Nucleic Acids Research*. 2009;37:D105–10.
62. Chou C-H, Shrestha S, Yang C-D, Chang N-W, Lin Y-L, Liao K-W, et al. miRTarBase update 2018: a resource for experimentally validated microRNA-target interactions. *Nucleic Acids Research*. 2018;46:D296–302.

63. Yu G, Wang L-G, Han Y, He Q-Y. clusterProfiler: an R Package for Comparing Biological Themes Among Gene Clusters. *OMICS: A Journal of Integrative Biology*. 2012;16:284–7.
64. Mootha VK, Lindgren CM, Eriksson K-F, Subramanian A, Sihag S, Lehar J, et al. PGC-1 $\alpha$ -responsive genes involved in oxidative phosphorylation are coordinately downregulated in human diabetes. *Nat Genet*. 2003;34:267–73.
65. Imrichová H, Hulselmans G, Kalender Atak Z, Potier D, Aerts S. i-cisTarget 2015 update: generalized cis-regulatory enrichment analysis in human, mouse and fly. *Nucleic Acids Res*. 2015;43:W57–64.
66. Blokzijl F, Janssen R, van Boxtel R, Cuppen E. MutationalPatterns: comprehensive genome-wide analysis of mutational processes. *Genome Med*. 2018;10:33.
67. Tate JG, Bamford S, Jubb HC, Sondka Z, Beare DM, Bindal N, et al. COSMIC: the Catalogue Of Somatic Mutations In Cancer. *Nucleic Acids Research*. 2019;47:D941–7.
68. Robinson JT, Thorvaldsdóttir H, Winckler W, Guttman M, Lander ES, Getz G, et al. Integrative genomics viewer. *Nat Biotechnol*. 2011;29:24–6.
